# Supplementary material for: Genome-wide identification of the bHLH transcription factor family in Rosa persica and response to low-temperature stress
Source: PeerJ journal article supplement (doi:10.7717/peerj.16568), 2024-01-03

### Motif1

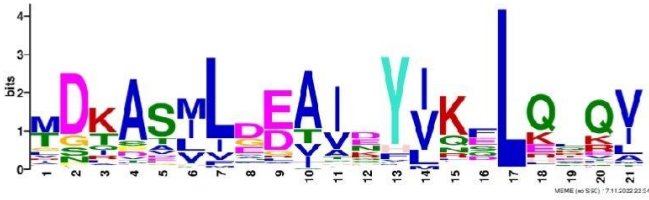

### Motif6

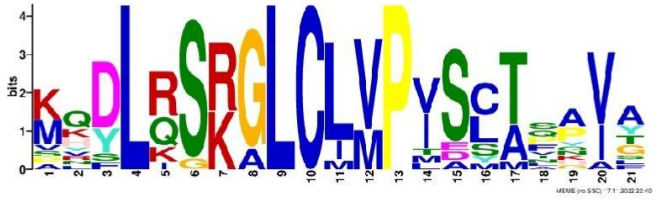

### Motif2

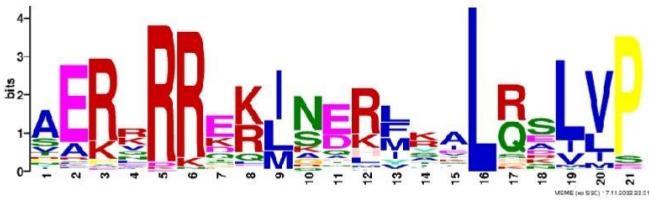

### Motif7

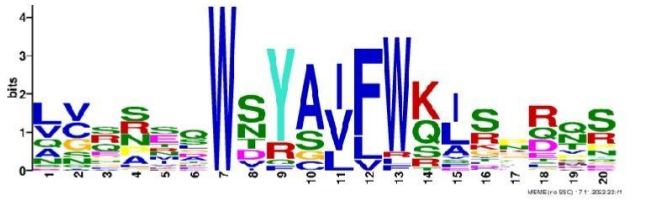

### Motif3

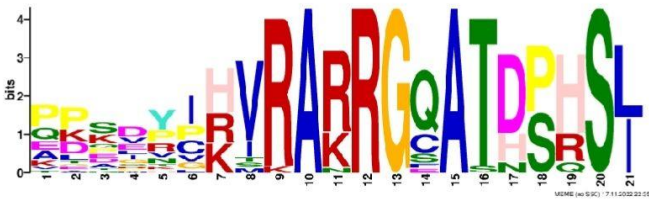

### Motif8

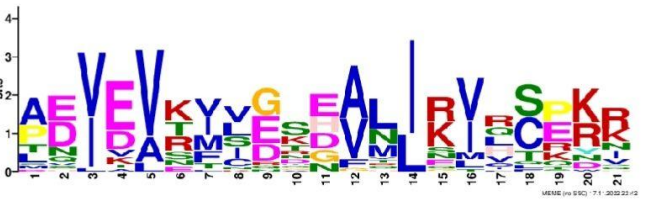

### Motif4

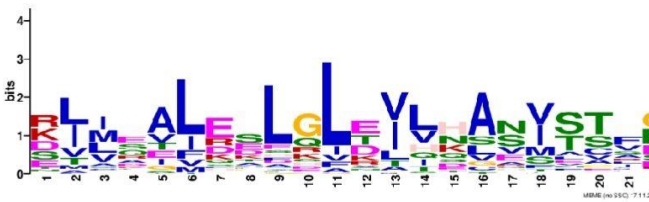

### Motif9

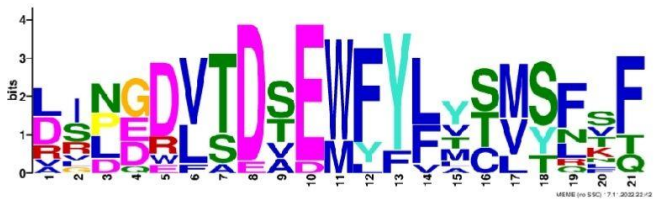

### Motif5

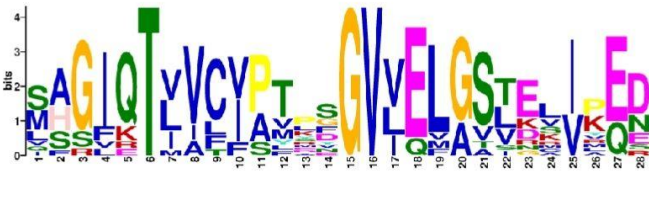

### Motif10

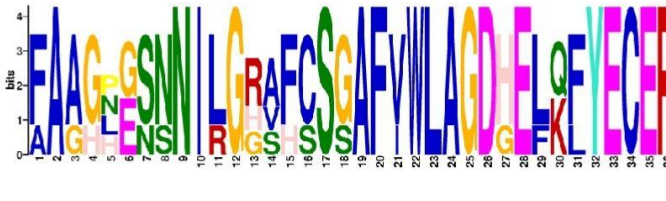

Supplement: FigS2.pdf [file FigS2.pdf]
