# Supplementary material for: Genome-wide identification of the bHLH transcription factor family in Rosa persica and response to low-temperature stress
Source: PeerJ journal article supplement (doi:10.7717/peerj.16568), 2024-01-03

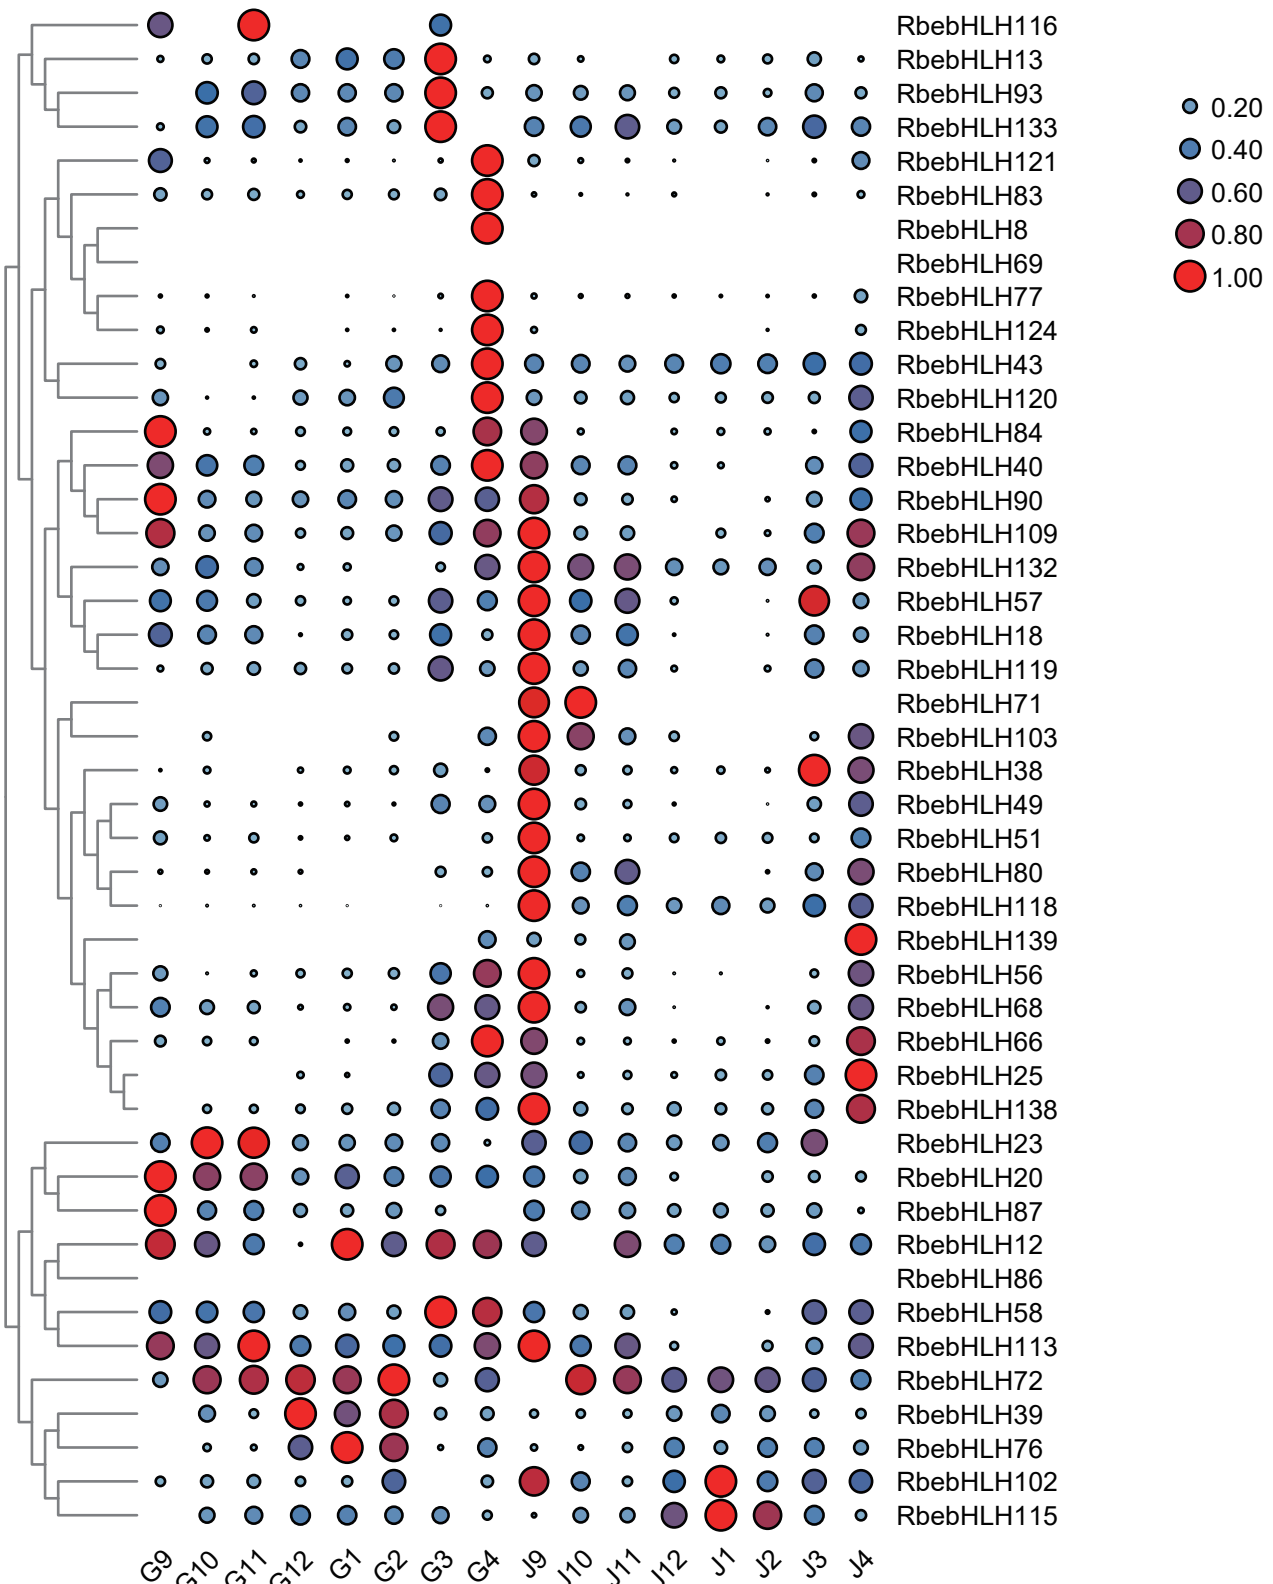

Supplement: FigS3.pdf [file FigS3.pdf]
